# Supplementary material for: What is Normal? Female Lower Limb Kinematic Profiles During Athletic Tasks Used to Examine Anterior Cruciate Ligament Injury Risk: A Systematic Review
Source: Springer Nature journal article supplement (doi:10.1007/s40279-014-0168-8), 2014-03-28
Supplement: 40279_2014_168_MOESM1_ESM.pdf [file 40279_2014_168_MOESM1_ESM.pdf]

**Table S1 – Results of methodological quality assessment undertaken on included studies**

| Study                                      | 1* | 2 | 3 | 6 | 7 | 11 | 12 | 16 | 18 | 20 | Total (/10) |
|--------------------------------------------|----|---|---|---|---|----|----|----|----|----|-------------|
| Beaulieu et al. <sup>[163]</sup>           | Y  | Y | Y | Y | Y | Y  | N  | Y  | Y  | Y  | 9           |
| Beaulieu & Palmieri-Smith <sup>[164]</sup> | Y  | Y | Y | Y | Y | Y  | N  | Y  | Y  | Y  | 9           |
| Chappell & Limpivasti <sup>[165]</sup>     | Y  | Y | Y | Y | Y | Y  | N  | Y  | Y  | Y  | 9           |
| Cortes et al. <sup>[166]</sup>             | Y  | Y | Y | Y | Y | N  | N  | Y  | Y  | Y  | 8           |
| Earl et al. <sup>[167]</sup>               | Y  | Y | Y | Y | Y | Y  | N  | Y  | Y  | Y  | 9           |
| Ford et al. <sup>[168]</sup>               | Y  | Y | Y | Y | Y | Y  | N  | Y  | Y  | Y  | 9           |
| Harty et al. <sup>[171]</sup>              | Y  | N | Y | N | Y | Y  | N  | Y  | Y  | Y  | 7           |
| Hewett et al. <sup>[16]</sup>              | Y  | Y | Y | N | Y | Y  | N  | Y  | Y  | Y  | 8           |
| Iguchi et al. <sup>[172]</sup>             | Y  | Y | Y | Y | Y | Y  | N  | Y  | Y  | Y  | 9           |
| Jorakate et al. <sup>[173]</sup>           | Y  | Y | Y | N | Y | Y  | N  | Y  | Y  | Y  | 8           |
| Joseph et al. <sup>[174]</sup>             | Y  | Y | N | Y | Y | Y  | N  | Y  | Y  | Y  | 8           |
| Kiriyama et al. <sup>[175]</sup>           | Y  | Y | Y | Y | Y | Y  | N  | Y  | Y  | Y  | 9           |
| Kristianslund & Krosshaug <sup>[176]</sup> | Y  | Y | Y | Y | Y | N  | N  | Y  | Y  | Y  | 8           |
| McCurdy et al. <sup>[177]</sup>            | Y  | N | Y | N | Y | Y  | N  | Y  | Y  | Y  | 7           |
| McLean et al. <sup>[178]</sup>             | Y  | Y | Y | Y | Y | Y  | N  | Y  | Y  | Y  | 9           |
| McLean et al. <sup>[179]</sup>             | Y  | Y | Y | Y | Y | Y  | N  | Y  | Y  | Y  | 9           |
| Nagano et al. <sup>[180]</sup>             | Y  | Y | Y | N | Y | N  | N  | Y  | Y  | Y  | 7           |
| Nagano et al. <sup>[181]</sup>             | Y  | Y | Y | Y | Y | N  | N  | Y  | Y  | Y  | 8           |
| O'Connor & Bottum <sup>[182]</sup>         | Y  | Y | Y | Y | Y | N  | N  | Y  | Y  | Y  | 8           |
| Orishimo et al. <sup>[183]</sup>           | Y  | Y | Y | Y | Y | Y  | N  | N  | Y  | Y  | 8           |
| Russell et al. <sup>[185]</sup>            | Y  | Y | Y | N | Y | N  | N  | Y  | Y  | Y  | 7           |
| Sanna & O'Connor <sup>[186]</sup>          | Y  | Y | Y | Y | Y | Y  | N  | Y  | Y  | Y  | 9           |
| Schmitz et al. <sup>[187]</sup>            | Y  | N | Y | Y | Y | Y  | N  | Y  | Y  | Y  | 8           |
| Shultz et al. <sup>[188]</sup>             | Y  | Y | N | Y | Y | N  | N  | Y  | Y  | Y  | 7           |
| Weinhandl et al. <sup>[189]</sup>          | Y  | Y | Y | Y | Y | N  | N  | Y  | Y  | Y  | 8           |

\* Numbers in this row refer to the question number in the Downs and Black<sup>[33]</sup> scale. The questions appear below. Y – Yes, N – No.

1 = Is the hypothesis/aim/objective of the study clearly described?

2 = Are the main outcome measures clearly described in the Introduction or Methods section?

3 = Are the characteristics of the patients included in the study clearly described?

6 = Are the main findings of the study clearly described?

7 = Does the study provide estimates of the random variability in the data for main outcomes?

11 = Were the subjects asked to participate in the study representative of the entire population from which they were recruited?

12 = Were those subjects who were prepared to participate representative of the entire population from which they were recruited?

16 = If any of the results of the study were based on 'data dredging,' was this made clear?

18 = Were the statistical tests used to assess main outcomes appropriate?

20 = Were the main outcome measures used accurate (valid and reliable)?
