# Supplementary material for: What is Normal? Female Lower Limb Kinematic Profiles During Athletic Tasks Used to Examine Anterior Cruciate Ligament Injury Risk: A Systematic Review
Source: Springer Nature journal article supplement (doi:10.1007/s40279-014-0168-8), 2014-03-28
Supplement: 40279_2014_168_MOESM2_ESM.pdf [file 40279_2014_168_MOESM2_ESM.pdf]

**Table S2 – Standardised kinematic data (Mean ± SD) from included studies examining the single leg drop land task**

|                                   | <b>H<sub>FLEX/EXT</sub></b><br><b>(IC)</b> | <b>H<sub>FLEX/EXT</sub></b><br><b>(Peak)</b> | <b>H<sub>ADD/ABD</sub></b><br><b>(IC)</b> | <b>H<sub>ADD/ABD</sub></b><br><b>(Peak)</b> | <b>H<sub>INT/EXT</sub></b><br><b>(IC)</b> | <b>H<sub>INT/EXT</sub></b><br><b>(Peak)</b> | <b>K<sub>EXT/FLEX</sub></b><br><b>(IC)</b> | <b>K<sub>EXT/FLEX</sub></b><br><b>(Peak)</b> | <b>K<sub>VAR/VALG</sub></b><br><b>(IC)</b> | <b>K<sub>VAR/VALG</sub></b><br><b>(Peak)</b> | <b>K<sub>INT/EXT</sub></b><br><b>(IC)</b> | <b>K<sub>INT/EXT</sub></b><br><b>(Peak)</b> |
|-----------------------------------|--------------------------------------------|----------------------------------------------|-------------------------------------------|---------------------------------------------|-------------------------------------------|---------------------------------------------|--------------------------------------------|----------------------------------------------|--------------------------------------------|----------------------------------------------|-------------------------------------------|---------------------------------------------|
| Harty et al. <sup>[171]</sup>     | N/A                                        | 27.9 ± 8.3                                   | N/A                                       | 8.9 ± 5.1                                   | N/A                                       | N/A                                         | N/A                                        | -53.7 ± 7.5                                  | N/A                                        | 2.3 ± 4.2                                    | N/A                                       | N/A                                         |
| Kiriyama et al. <sup>[175]</sup>  | N/A                                        | N/A                                          | N/A                                       | N/A                                         | N/A                                       | N/A                                         | N/A                                        | N/A                                          | N/A                                        | N/A                                          | N/A                                       | 13.7 ± 9.1                                  |
| Nagano et al. <sup>[180]</sup>    | N/A                                        | N/A                                          | N/A                                       | N/A                                         | N/A                                       | N/A                                         | -18.0 ± 1.5                                | N/A                                          | 1.8 ± 0.6                                  | N/A                                          | -2.2 ± 1.4                                | N/A                                         |
| Nagano et al. <sup>[181]</sup>    | N/A                                        | N/A                                          | N/A                                       | N/A                                         | N/A                                       | N/A                                         | -15.8 ± 5.0                                | -72.5 ± 6.7                                  | 4.0 ± 2.6                                  | 1.2 ± 5.2                                    | -9.0 ± 3.4                                | -12.3 ± 5.5                                 |
| Orishimo et al. <sup>[183]</sup>  | 5.9 ± 8.5                                  | N/A                                          | -12.5 ± 5.0                               | N/A                                         | N/A                                       | N/A                                         | -3.5 ± 4.4                                 | -58.7 ± 5.5                                  | 1.3 ± 3.7                                  | N/A                                          | N/A                                       | N/A                                         |
| Russell et al. <sup>[185]</sup>   | N/A                                        | N/A                                          | N/A                                       | N/A                                         | N/A                                       | N/A                                         | N/A                                        | N/A                                          | -0.7 ± 3.3                                 | N/A                                          | N/A                                       | N/A                                         |
| Schmitz et al. <sup>[187]</sup>   | 21.6 ± 6.3                                 | N/A                                          | N/A                                       | N/A                                         | N/A                                       | N/A                                         | -42.5 ± 9.4                                | N/A                                          | N/A                                        | N/A                                          | N/A                                       | N/A                                         |
| Weinhandl et al. <sup>[189]</sup> | 15.7 ± 9.3                                 | N/A                                          | -7.3 ± 7.5                                | N/A                                         | N/A                                       | N/A                                         | -12.8 ± 5.6                                | N/A                                          | 0.2 ± 2.8                                  | N/A                                          | N/A                                       | N/A                                         |

**H<sub>FLEX/EXT</sub>** – Hip flexion/extension; **H<sub>ADD/ABD</sub>** – Hip adduction/abduction; **H<sub>INT/EXT</sub>** – Hip internal/external rotation; **K<sub>EXT/FLEX</sub>** – Knee extension/flexion; **K<sub>VAR/VALG</sub>** – Knee varus/valgus; **K<sub>INT/EXT</sub>** – Knee internal/external rotation. First listed joint rotation denoted by positive (+) angles; second listed joint rotation denoted by negative (-) angles.  
 ± – Plus/minus; **IC** – Initial contact; **Peak** – Peak values; **SD** – Standard deviation; **N/A** – Not applicable
