# Supplementary material for: What is Normal? Female Lower Limb Kinematic Profiles During Athletic Tasks Used to Examine Anterior Cruciate Ligament Injury Risk: A Systematic Review
Source: Springer Nature journal article supplement (doi:10.1007/s40279-014-0168-8), 2014-03-28
Supplement: 40279_2014_168_MOESM3_ESM.pdf [file 40279_2014_168_MOESM3_ESM.pdf]

**Table S3 – Standardised kinematic data (Mean ± SD) from included studies examining the double leg drop vertical jump task**

|                                            | <b>H<sub>FLEX/EXT</sub></b><br><b>(IC)</b> | <b>H<sub>FLEX/EXT</sub></b><br><b>(Peak)</b> | <b>H<sub>ADD/ABD</sub></b><br><b>(IC)</b> | <b>H<sub>ADD/ABD</sub></b><br><b>(Peak)</b> | <b>H<sub>INT/EXT</sub></b><br><b>(IC)</b> | <b>H<sub>INT/EXT</sub></b><br><b>(Peak)</b> | <b>K<sub>EXT/FLEX</sub></b><br><b>(IC)</b> | <b>K<sub>EXT/FLEX</sub></b><br><b>(Peak)</b> | <b>K<sub>VAR/VALG</sub></b><br><b>(IC)</b> | <b>K<sub>VAR/VALG</sub></b><br><b>(Peak)</b> | <b>K<sub>INT/EXT</sub></b><br><b>(IC)</b> | <b>K<sub>INT/EXT</sub></b><br><b>(Peak)</b> |
|--------------------------------------------|--------------------------------------------|----------------------------------------------|-------------------------------------------|---------------------------------------------|-------------------------------------------|---------------------------------------------|--------------------------------------------|----------------------------------------------|--------------------------------------------|----------------------------------------------|-------------------------------------------|---------------------------------------------|
| Beaulieu & Palmieri-Smith <sup>[164]</sup> | N/A                                        | N/A                                          | N/A                                       | N/A                                         | N/A                                       | N/A                                         | N/A                                        | N/A                                          | -0.4 ± 1.9                                 | -3.2 ± 3.1                                   | N/A                                       | N/A                                         |
| Chappell & Limpisvasti <sup>[165]</sup>    | 54.8 ± 11.4                                | 85.0 ± 13.6                                  | -9.6 ± 5.2                                | -8.7 ± 8.0                                  | -14.1 ± 11.2                              | -18.5 ± 16.6                                | -29.9 ± 9.0                                | -81.3 ± 10.5                                 | -6.1 ± 6.2                                 | -25.7 ± 14.7                                 | 30.6 ± 19.8                               | 57.7 ± 20.8                                 |
| Earl et al. <sup>[167]</sup>               | N/A                                        | N/A                                          | N/A                                       | 1.9 ± 1.9                                   | N/A                                       | 1.6 ± 5.1                                   | N/A                                        | -94.4 ± 11.7                                 | N/A                                        | -6.0 ± 4.7                                   | N/A                                       | 0.3 ± 3.2                                   |
| Ford et al. <sup>[168]</sup>               | N/A                                        | 59.0 ± 10.2                                  | N/A                                       | N/A                                         | N/A                                       | N/A                                         | N/A                                        | -84.0 ± 8.1                                  | N/A                                        | N/A                                          | N/A                                       | N/A                                         |
| Harty et al. <sup>[171]</sup>              | N/A                                        | 53.4 ± 13.3                                  | N/A                                       | 1.0 ± 5.3                                   | N/A                                       | N/A                                         | N/A                                        | -86.5 ± 7.3                                  | N/A                                        | -7.1 ± 4.5                                   | N/A                                       | N/A                                         |
| Hewett et al. <sup>[16]</sup>              | N/A                                        | N/A                                          | N/A                                       | N/A                                         | N/A                                       | N/A                                         | N/A                                        | -82.4 ± 8.0                                  | N/A                                        | N/A                                          | N/A                                       | N/A                                         |
| Joseph et al. <sup>[174]</sup>             | N/A                                        | N/A                                          | N/A                                       | N/A                                         | N/A                                       | N/A                                         | N/A                                        | N/A                                          | -3.0 ± 1.0                                 | -9.3 ± 3.6                                   | N/A                                       | N/A                                         |
| Kristianslund & Krosshaug <sup>[176]</sup> | N/A                                        | N/A                                          | N/A                                       | N/A                                         | N/A                                       | N/A                                         | -31.5 ± 6.5                                | -82.2 ± 11.8                                 | 1.2 ± 4.0                                  | -5.6 ± 4.6                                   | -1.4 ± 6.0                                | 9.3 ± 5.3                                   |
| McCurdy et al. <sup>[177]</sup>            | N/A                                        | 55.9 ± 3.7                                   | N/A                                       | N/A                                         | N/A                                       | N/A                                         | N/A                                        | -85.9 ± 5.6                                  | N/A                                        | -13.9 ± 2.2                                  | N/A                                       | N/A                                         |
| McLean et al. <sup>[178]</sup>             | 33.5 ± 5.3                                 | 62.7 ± 13.1                                  | -2.2 ± 2.3                                | 3.1 ± 4.2                                   | -2.0 ± 8.7                                | 0.9 ± 8.8                                   | -24.1 ± 4.4                                | -85.6 ± 10.2                                 | 2.0 ± 4.3                                  | -3.4 ± 4.4                                   | 3.8 ± 4.2                                 | 12.5 ± 7.1                                  |
| Shultz et al. <sup>[188]</sup>             | 25.3 ± 6.4                                 | N/A                                          | N/A                                       | N/A                                         | N/A                                       | N/A                                         | -17.0 ± 5.9                                | N/A                                          | N/A                                        | N/A                                          | N/A                                       | N/A                                         |

**H<sub>FLEX/EXT</sub>** – Hip flexion/extension; **H<sub>ADD/ABD</sub>** – Hip adduction/abduction; **H<sub>INT/EXT</sub>** – Hip internal/external rotation; **K<sub>EXT/FLEX</sub>** – Knee extension/flexion; **K<sub>VAR/VALG</sub>** – Knee varus/valgus; **K<sub>INT/EXT</sub>** – Knee internal/external rotation. First listed joint rotation denoted by positive (+) angles; second listed joint rotation denoted by negative (-) angles.  
 ± – Plus/minus; **IC** – Initial contact; **Peak** – Peak values; **SD** – Standard deviation; **N/A** – Not applicable
