# Supplementary material for: What is Normal? Female Lower Limb Kinematic Profiles During Athletic Tasks Used to Examine Anterior Cruciate Ligament Injury Risk: A Systematic Review
Source: Springer Nature journal article supplement (doi:10.1007/s40279-014-0168-8), 2014-03-28
Supplement: 40279_2014_168_MOESM4_ESM.pdf [file 40279_2014_168_MOESM4_ESM.pdf]

**Table S4 – Standardised kinematic data (Mean ± SD) from included studies examining the side-step cutting task**

|                                    | <b>H<sub>FLEX/EXT</sub></b><br><b>(IC)</b> | <b>H<sub>FLEX/EXT</sub></b><br><b>(Peak)</b> | <b>H<sub>ADD/ABD</sub></b><br><b>(IC)</b> | <b>H<sub>ADD/ABD</sub></b><br><b>(Peak)</b> | <b>H<sub>INT/EXT</sub></b><br><b>(IC)</b> | <b>H<sub>INT/EXT</sub></b><br><b>(Peak)</b> | <b>K<sub>EXT/FLEX</sub></b><br><b>(IC)</b> | <b>K<sub>EXT/FLEX</sub></b><br><b>(Peak)</b> | <b>K<sub>VAR/VALG</sub></b><br><b>(IC)</b> | <b>K<sub>VAR/VALG</sub></b><br><b>(Peak)</b> | <b>K<sub>INT/EXT</sub></b><br><b>(IC)</b> | <b>K<sub>INT/EXT</sub></b><br><b>(Peak)</b> |
|------------------------------------|--------------------------------------------|----------------------------------------------|-------------------------------------------|---------------------------------------------|-------------------------------------------|---------------------------------------------|--------------------------------------------|----------------------------------------------|--------------------------------------------|----------------------------------------------|-------------------------------------------|---------------------------------------------|
| Beaulieu et al. <sup>[163]</sup>   | 51.9 ± 5.3                                 | 55.8 ± 5.1                                   | -13.9 ± 7.3                               | -9.4 ± 4.4                                  | -3.6 ± 11.2                               | 3.9 ± 11.4                                  | -18.0 ± 6.8                                | -57.9 ± 7.3                                  | -3.0 ± 5.1                                 | -15.3 ± 8.8                                  | -2.7 ± 7.3                                | 19.8 ± 6.0                                  |
| Cortes et al. <sup>[166]</sup>     | 36.5 ± 8.0                                 | 38.3 ± 8.8                                   | N/A                                       | N/A                                         | N/A                                       | N/A                                         | -25.5 ± 8.0                                | -53.1 ± 7.0                                  | -2.0 ± 2.5                                 | -7.11 ± 4.8                                  | N/A                                       | N/A                                         |
| Iguchi et al. <sup>[172]</sup>     | N/A                                        | 43.0 ± 8.4                                   | N/A                                       | N/A                                         | N/A                                       | N/A                                         | N/A                                        | -54.8 ± 6.4                                  | N/A                                        | N/A                                          | N/A                                       | N/A                                         |
| Jorrakate et al. <sup>[173]</sup>  | 47.1 ± 6.8                                 | N/A                                          | -4.0 ± 5.8                                | N/A                                         | 6.4 ± 16.5                                | N/A                                         | -27.0 ± 9.5                                | N/A                                          | 1.3 ± 7.2                                  | N/A                                          | -3.4 ± 10.2                               | N/A                                         |
| Jorrakate et al. <sup>[173]</sup>  | 57.8 ± 10.4                                | N/A                                          | -2.5 ± 7.0                                | N/A                                         | 11.8 ± 16.0                               | N/A                                         | -34.0 ± 11.7                               | N/A                                          | 3.8 ± 8.6                                  | N/A                                          | 3.3 ± 17.7                                | N/A                                         |
| McLean et al. <sup>[179]</sup>     | 40.0 ± 8.8                                 | 45.0 ± 8.8                                   | -10.1 ± 4.8                               | -27.4 ± 5.1                                 | 15.3 ± 10.5                               | 22.0 ± 8.7                                  | -25.2 ± 1.8                                | -61.9 ± 5.7                                  | -2.4 ± 3.7                                 | -10.6 ± 4.1                                  | 2.0 ± 8.6                                 | 17.7 ± 8.6                                  |
| O'Connor & Bottum <sup>[182]</sup> | N/A                                        | N/A                                          | N/A                                       | N/A                                         | N/A                                       | N/A                                         | -18.5 ± 5.6                                | N/A                                          | -1.6 ± 2.4                                 | N/A                                          | 1.1 ± 4.1                                 | N/A                                         |
| Sanna & O'Connor <sup>[186]</sup>  | 50.6 ± 9.8                                 | N/A                                          | -3.0 ± 6.0                                | N/A                                         | 8.8 ± 6.5                                 | N/A                                         | -28.1 ± 4.2                                | N/A                                          | -0.9 ± 1.4                                 | N/A                                          | -0.8 ± 4.9                                | N/A                                         |

**H<sub>FLEX/EXT</sub>** – Hip flexion/extension; **H<sub>ADD/ABD</sub>** – Hip adduction/abduction; **H<sub>INT/EXT</sub>** – Hip internal/external rotation; **K<sub>EXT/FLEX</sub>** – Knee extension/flexion; **K<sub>VAR/VALG</sub>** – Knee varus/valgus; **K<sub>INT/EXT</sub>** – Knee internal/external rotation. First listed joint rotation denoted by positive (+) angles; second listed joint rotation denoted by negative (-) angles.  
± – Plus/minus; **IC** – Initial contact; **Peak** – Peak values; **SD** – Standard deviation; **N/A** – Not applicable
