# Supplementary material for: What is Normal? Female Lower Limb Kinematic Profiles During Athletic Tasks Used to Examine Anterior Cruciate Ligament Injury Risk: A Systematic Review
Source: Springer Nature journal article supplement (doi:10.1007/s40279-014-0168-8), 2014-03-28
Supplement: 40279_2014_168_MOESM5_ESM.pdf [file 40279_2014_168_MOESM5_ESM.pdf]

**Figure S1 – Equations used to calculate weight, and weighted means and standard deviations<sup>[41]</sup>**

For a given kinematic variable with mean values of  $\{x_1, x_2, \dots, x_n\}$  and sample sizes of  $\{n_1, n_2, \dots, n_n\}$ , weight ( $w$ ) was calculated via the formula:

$$w_i = \frac{n_i}{n_1 + n_2 + \dots + n_n}$$

For a given kinematic variable with mean values of  $\{x_1, x_2, \dots, x_n\}$  and weights of  $\{w_1, w_2, \dots, w_n\}$ , weighted mean ( $\bar{X}_w$ ) was calculated via the formula:

$$\bar{X}_w = \frac{w_1x_1 + w_2x_2 + \dots + w_nx_n}{w_1 + w_2 + \dots + w_n}$$

For a given kinematic variable with mean values of  $\{x_1, x_2, \dots, x_n\}$ , sample sizes of  $\{n_1, n_2, \dots, n_n\}$  and standard deviations of  $\{S_1, S_2, \dots, S_n\}$ , the standard deviation of the weighted mean ( $SD_w$ ) was calculated via the formula:

$$SD_w = \sqrt{\frac{n_1 [S_1^2 + (x_1 - \bar{X}_w)^2] + n_2 [S_2^2 + (x_2 - \bar{X}_w)^2] + \dots + n_n [S_n^2 + (x_n - \bar{X}_w)^2]}{n_1 + n_2 + \dots + n_n}}$$
